# Supplementary material for: U-Shaped Relationship Between Blood Pressure and Suicide Attempts in Untreated First-Episode Major Depressive Disorder with Anxiety Symptoms
Source: Research Square preprint supplement (doi:10.21203/rs.3.rs-6106188/v1), 2025-04-17
Supplement: Supplementary file 1 [file 5c58cab757449548f94742a4.docx]

**Table S1 Covariate Checking and Screening**

| Variable | SBP(mmHg) | | | DBP(mmHg) | | |
| --- | --- | --- | --- | --- | --- | --- |
|  | Basic Model | Full Model | Choose  (Yes/No) | Basic Model | Full Model | Choose  (Yes/No) |
| Initial regression coefficient | 0.056 | 0.033 |  | 0.072 | 0.032 |  |
| Illness duration(months) | 0.055 | 0.033 |  | 0.070 | 0.031 |  |
| Age of oneset(years) | 0.072* | 0.028 * | Yes | 0.073 | 0.032 |  |
| Gender | 0.056 | 0.033 |  | 0.072 | 0.032 |  |
| Education | 0.057 | 0.032 |  | 0.070 | 0.032 |  |
| Marital status | 0.065* | 0.032 | Yes | 0.076 | 0.031 |  |
| HAMD | 0.039 * | 0.033 | Yes | 0.052 * | 0.033 | Yes |
| HAMA | 0.040 * | 0.029 * | Yes | 0.052 * | 0.031 | Yes |
| TSH(uIU/Ml) | 0.025 * | 0.039* | Yes | 0.035 * | 0.039 * | Yes |
| TGAb(IU/L) | 0.054 | 0.033 |  | 0.071 | 0.033 |  |
| TPOAb(IU/L) | 0.050 | 0.033 |  | 0.065 | 0.033 |  |
| FT3(pmol/L) | 0.056 | 0.033 |  | 0.072 | 0.032 |  |
| FT4(pmol/L) | 0.056 | 0.033 |  | 0.072 | 0.032 |  |
| FBG(mmol/L) | 0.051 | 0.033 |  | 0.065 | 0.032 |  |
| TC(mmol/L) | 0.043* | 0.033 | Yes | 0.057 * | 0.032 | Yes |
| HDL-C(mmol/L) | 0.051 | 0.033 |  | 0.066 | 0.032 |  |
| TG(mmol/L) | 0.055 | 0.032 |  | 0.071 | 0.032 |  |
| LDL-C( mmol/L) | 0.052 | 0.032 |  | 0.067 | 0.032 |  |
| BMI(kg/m²) | 0.057 | 0.031 |  | 0.072 | 0.032 |  |

* indicates a change of more than 10% from the initial regression coefficient

We also adjusted for features that, when added to this model, changed the matched regression coefficient by at least 10 percent.
